# Supplementary material
Source: PubMed Central journal article supplement (PMC3336956)

## SUPPLEMENTARY DATA

FIG. S1. Domestication-related traits examined in  $F_2$  population (JP81610  $\times$  TVnu457). JP81610 is a cultivated (C) accession and TVnu457 is a wild (W) accession.

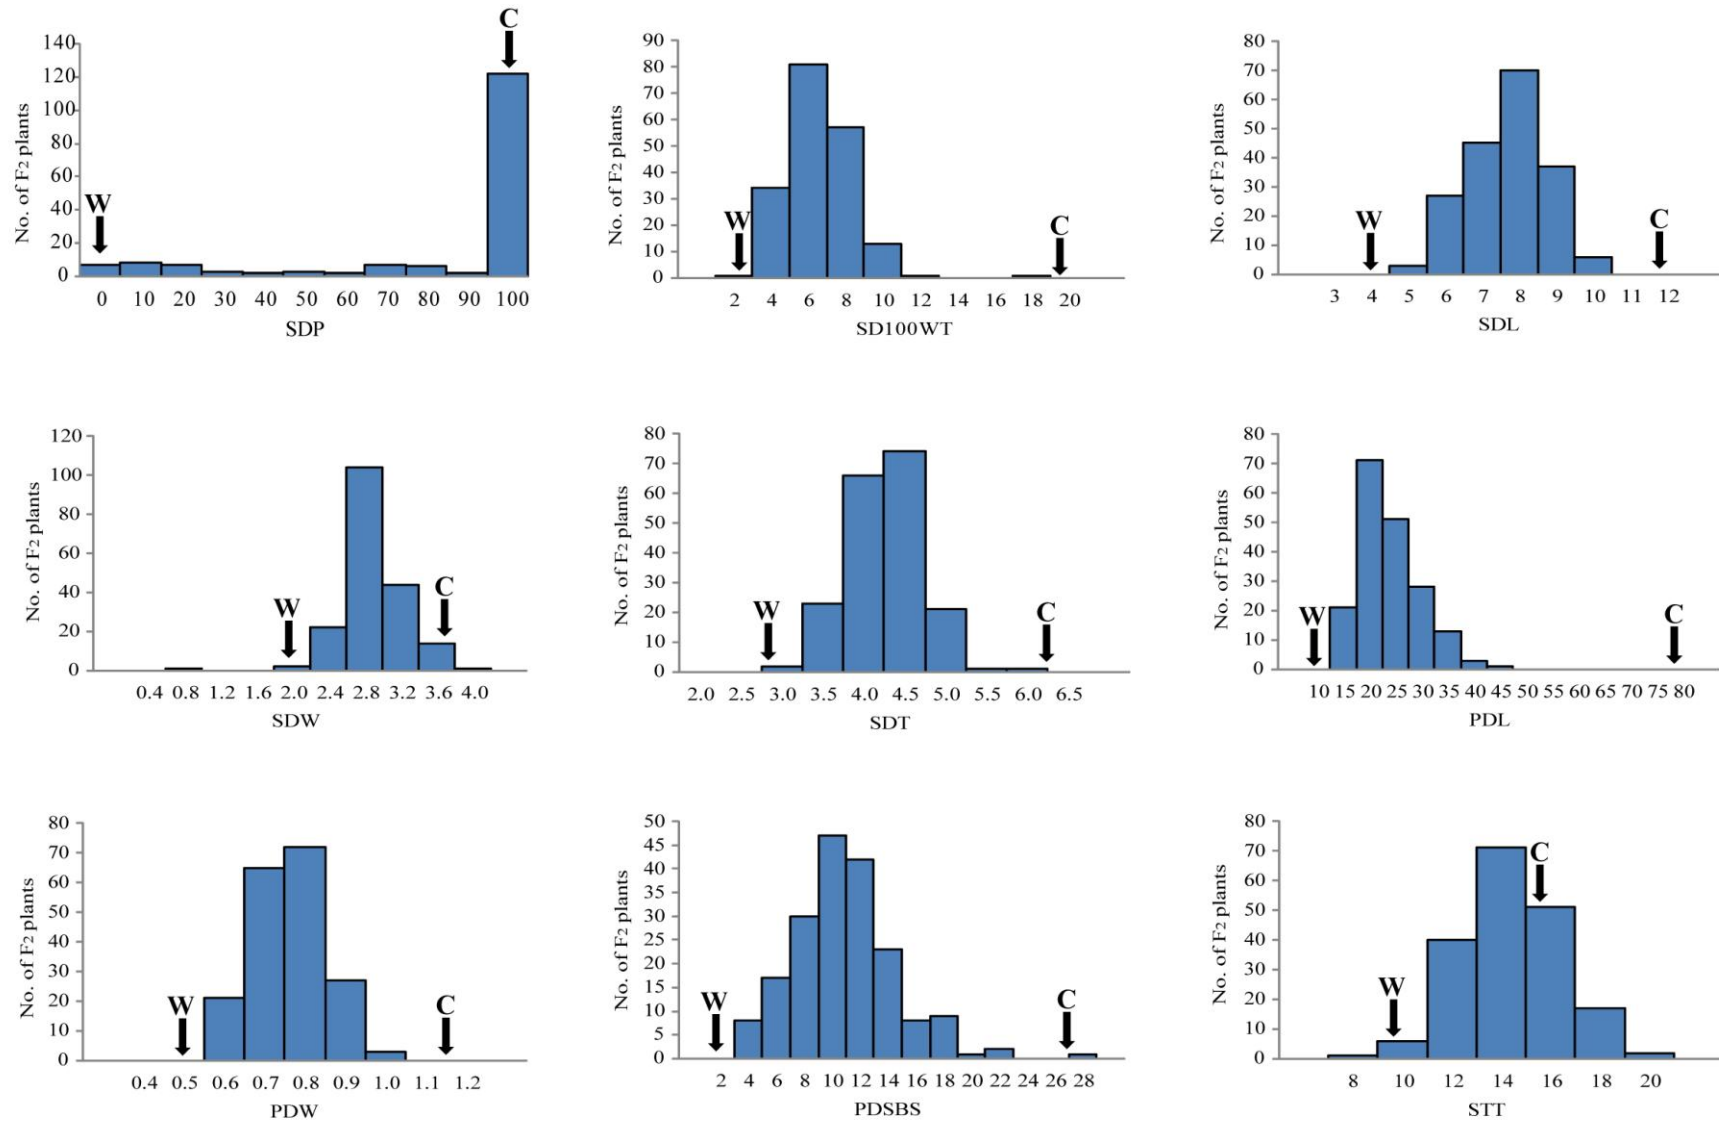

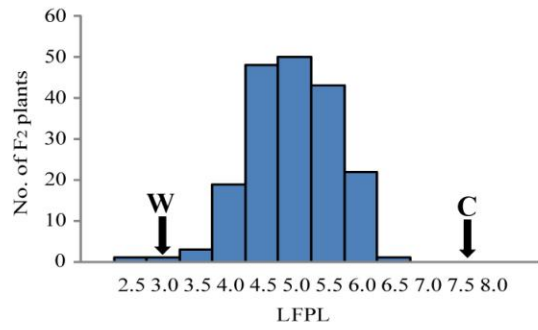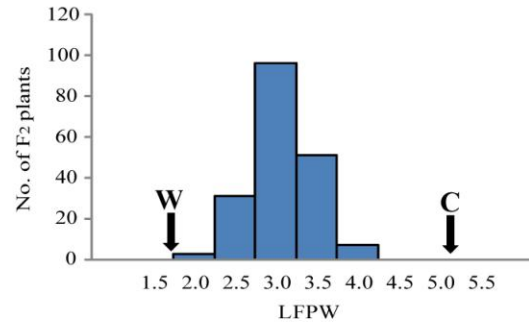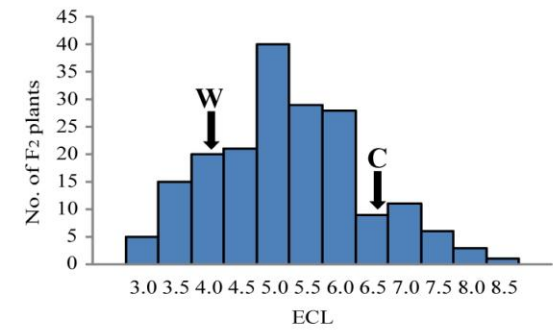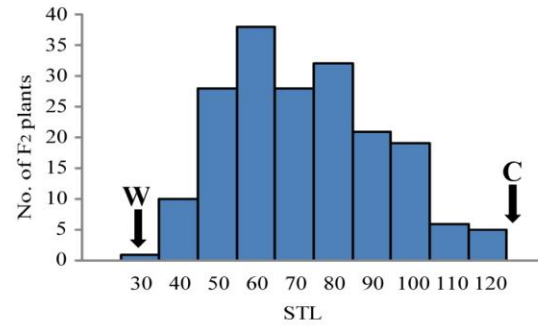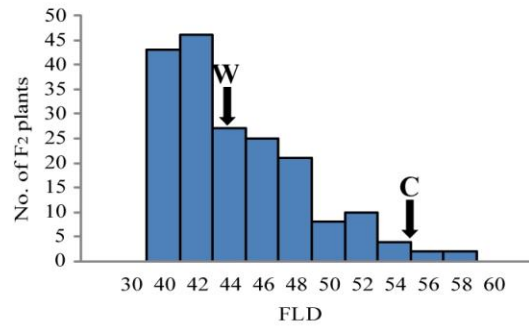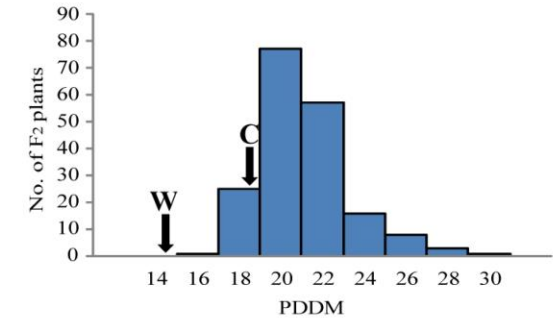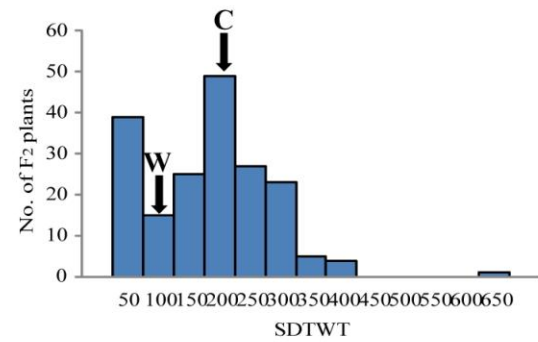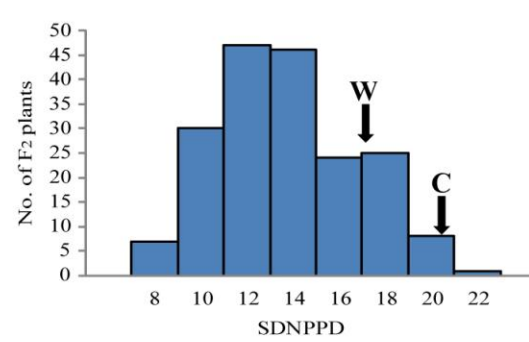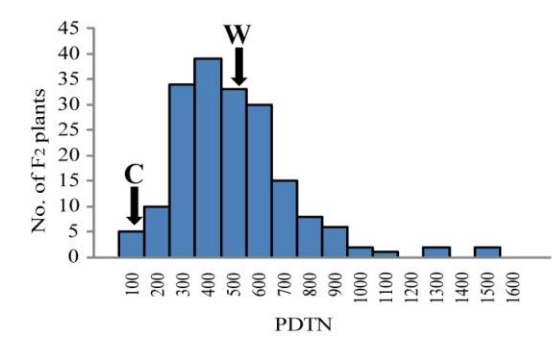

FIG. S2. Domestication-related traits examined in  $BC_1F_1$  population [(JP81610  $\times$  TVnu457)  $\times$  JP81610]. JP81610 is a cultivated (C) accession and TVnu457 is a wild (W) accession.

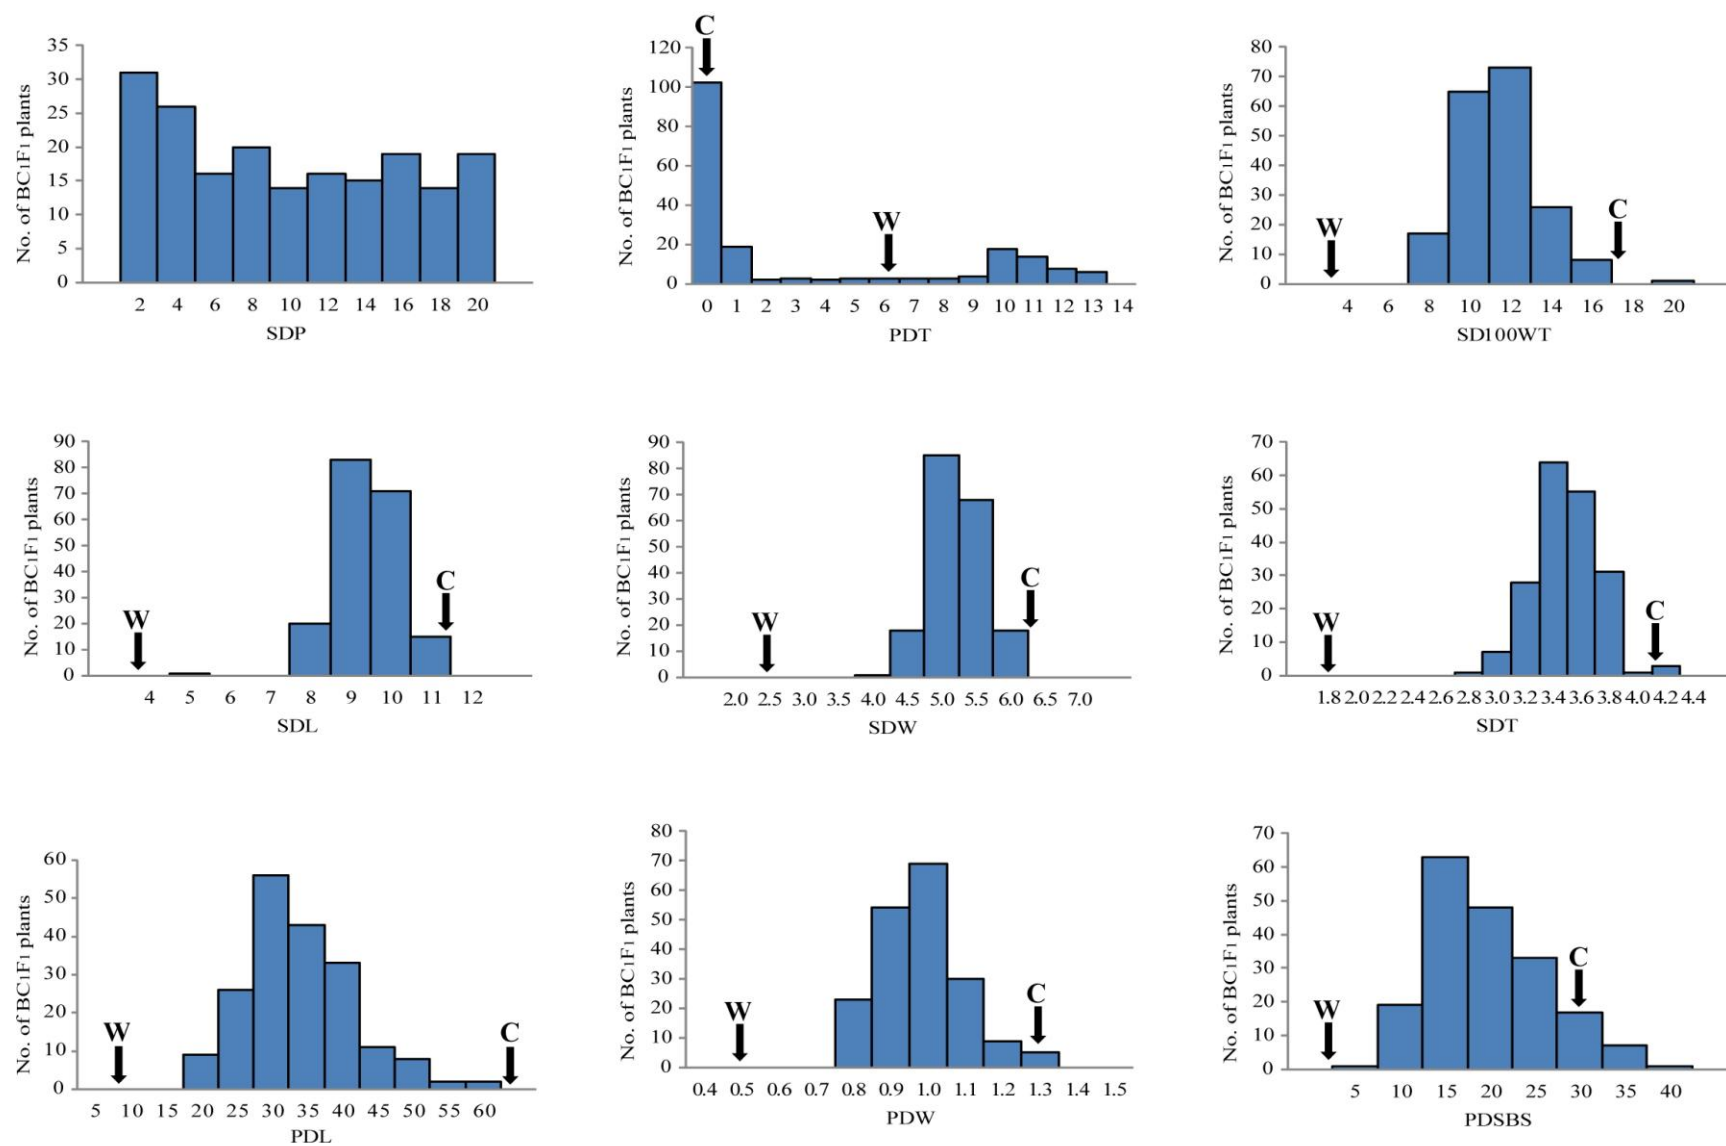

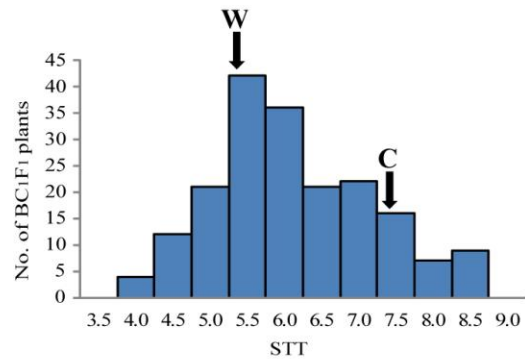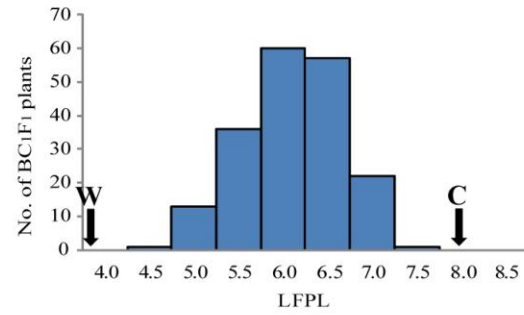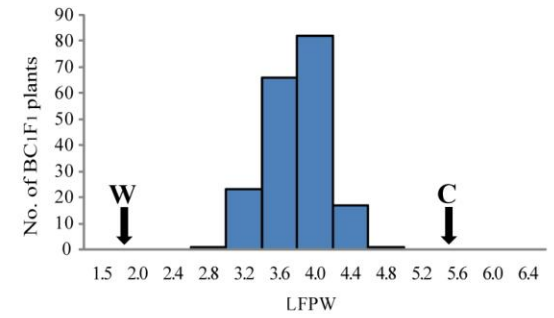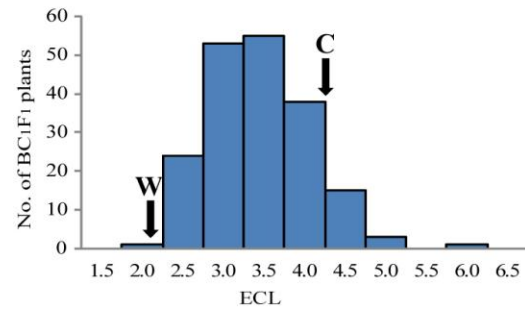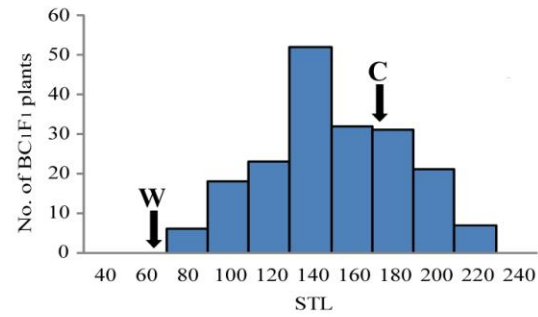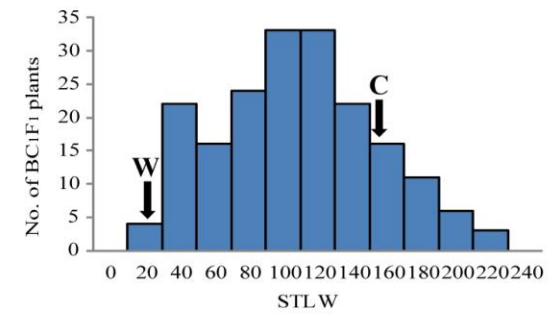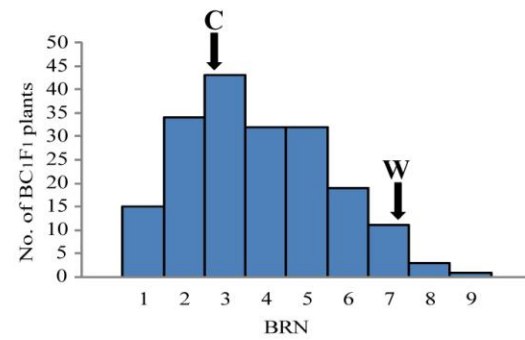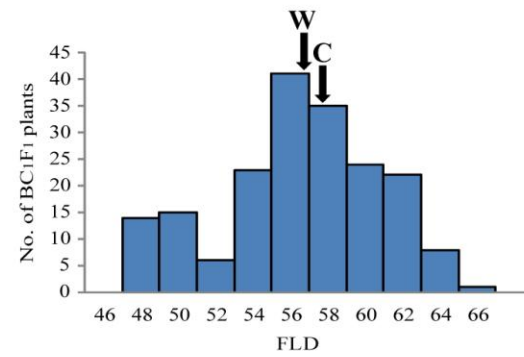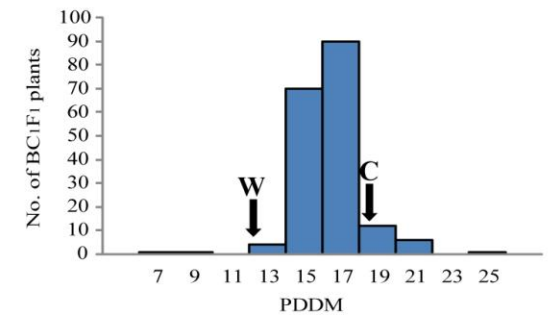

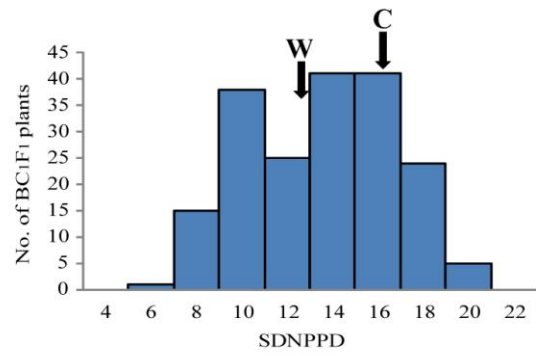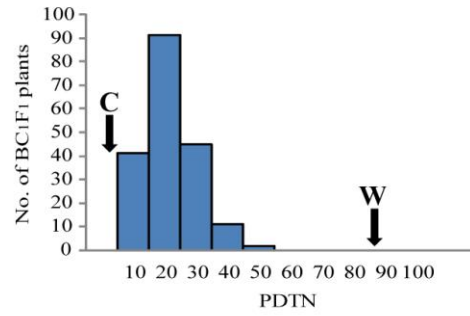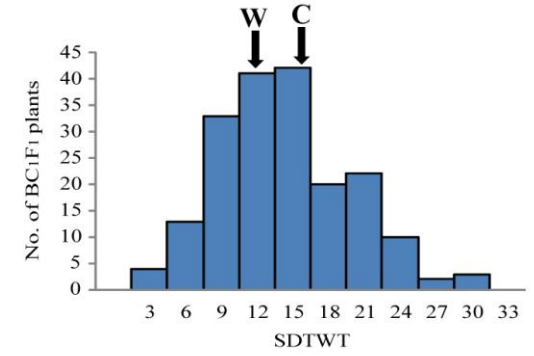

Supplement: supp_mcs048_mcs048supp_figs.pdf [file supp_mcs048_mcs048supp_figs.pdf]
